# Supplementary material
Source: HighWire-hosted journal article supplement (https://hw-f5-jim.highwire.org/content/jim-2020-001621)
Supplement: inline-supplementary-material-1 [file inline-supplementary-material-1.pdf]

**Supple Table 1. Correlations between changes in HbA1c and those in clinical variables from baseline to 24 weeks after treatment with dapagliflozin in 33 people with type 2 diabetes and NAFLD**

| Variable                                    | Changes in HbA1c (%) |         |
|---------------------------------------------|----------------------|---------|
|                                             | r                    | P value |
| Changes in body weight (Kg)                 | -0.3274              | 0.0674  |
| Changes in BMI                              | -0.3029              | 0.0977  |
| Changes in VFA (cm <sup>2</sup> )           | -0.08627             | 0.6445  |
| Changes in total fat mass (kg)              | -0.01607             | 0.9328  |
| Changes in total body water (kg)            | -0.4568              | 0.0112  |
| Changes in FPG (mmol/l)                     | 0.3472               | 0.0602  |
| Changes in LDL cholesterol (mmol/l)         | 0.2268               | 0.2198  |
| Changes in Triglyceride (mmol/l)            | -0.1751              | 0.3461  |
| Changes in HDL-cholesterol (mmol/l)         | -0.1732              | 0.3514  |
| Changes in ALT (U/L)                        | 0.08692              | 0.6420  |
| Changes in GGT (U/L)                        | 0.03607              | 0.8473  |
| Changes in uric acid (μmol/l)               | -0.2052              | 0.2682  |
| Changes in eGFR (ml/min1.73m <sup>2</sup> ) | 0.3638               | 0.0407  |
| Changes in hematocrit (%)                   | -0.01487             | 0.9367  |
| Changes in HMW adiponectin (μg/ml)          | -0.3927              | 0.0289  |

---

|                                                  |        |        |
|--------------------------------------------------|--------|--------|
| Changes in hs-CRP ( $\mu\text{g/ml}$ )           | 0.131  | 0.4823 |
| Changes in type 4 collagen 7S ( $\text{ng/ml}$ ) | 0.4072 | 0.0230 |
| Changes in CAP ( $\text{dB/m}$ )                 | 0.4288 | 0.0203 |

---

BMI, body mass index; WC, waist circumference; VFA, visceral fat area; FPG, fasting plasma glucose; LDL, low-density lipoprotein; HDL, high-density lipoprotein; RLP, remnant like lipoprotein; AST, aspartate aminotransferase; ALT, alanine transaminase; GGT,  $\gamma$ -glutamyltranspeptidase ;eGFR, estimated glomerular filtration rate; hs-CRP, high sensitivity C-reactive protein; HMW, high-molecular weight; CAP, controlled attenuation parameter
